# Supplementary material for: Automated Electrophysiological and Pharmacological Evaluation of Human Pluripotent Stem Cell-Derived Cardiomyocytes
Source: PubMed Central journal article supplement (PMC4790208; doi:10.1089/scd.2015.0253), 2016-02-23
Supplement: Supp_Fig2.pdf [file Supp_Fig2.pdf]

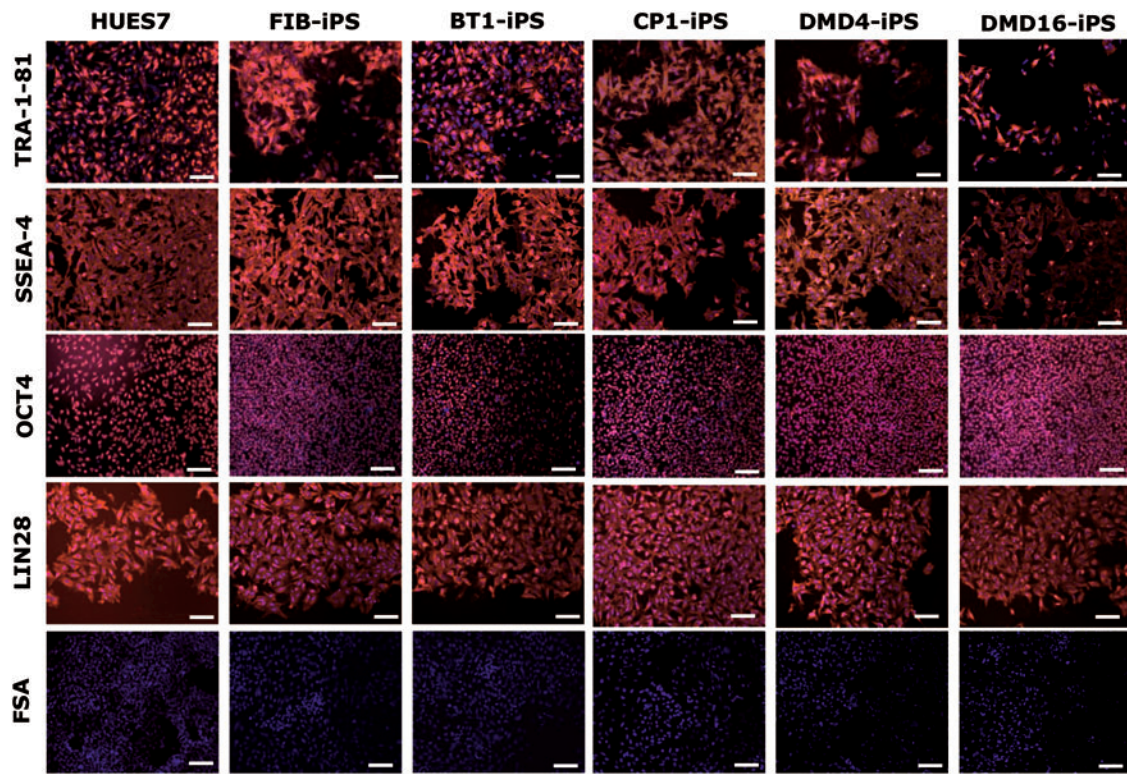

**SUPPLEMENTARY FIG. S2.** Detection of pluripotency marker expression in the hiPSC lines by immunofluorescence. Immunofluorescence analysis of HUES7 hESCs and FIB-, BT1-, CP1-, DMD4- and DMD16-hiPSCs, showing them to stain negative for the fibroblast-specific marker FSA, and stain positive for the pluripotency markers TRA-1-81, SSEA-4, OCT-4, and LIN28. Scale bars represent 65  $\mu$ m. hESCs, human embryonic stem cells.
