# Supplementary material for: Automated Electrophysiological and Pharmacological Evaluation of Human Pluripotent Stem Cell-Derived Cardiomyocytes
Source: PubMed Central journal article supplement (PMC4790208; doi:10.1089/scd.2015.0253), 2016-02-23
Supplement: Supp_Fig4.pdf [file Supp_Fig4.pdf]

**$\alpha$ -actinin staining of hPSC-CMs**

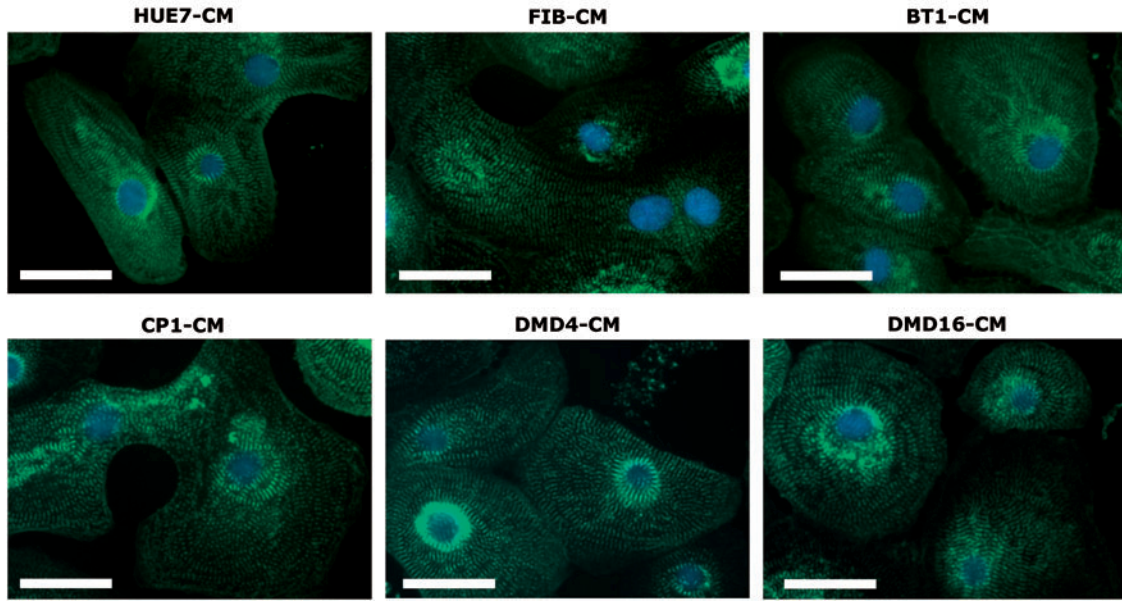

**SUPPLEMENTARY FIG. S4.** Detection of  $\alpha$ -actinin expression in hPSC-CMs by immunofluorescence. Immunofluorescence images of cardiomyocytes derived from HUES7 hESCs and FIB-, BT1-, CP1-, DMD4-, and DMD16-hiPSCs, showing positive cardiac  $\alpha$ -actinin staining highlighting characteristic cardiac muscle striations. Scale bars represent 32  $\mu$ m. hPSC-CMs, human pluripotent stem cell-derived cardiomyocytes.
