# Supplementary material for: Automated Electrophysiological and Pharmacological Evaluation of Human Pluripotent Stem Cell-Derived Cardiomyocytes
Source: PubMed Central journal article supplement (PMC4790208; doi:10.1089/scd.2015.0253), 2016-02-23
Supplement: Supp_Fig6.pdf [file Supp_Fig6.pdf]

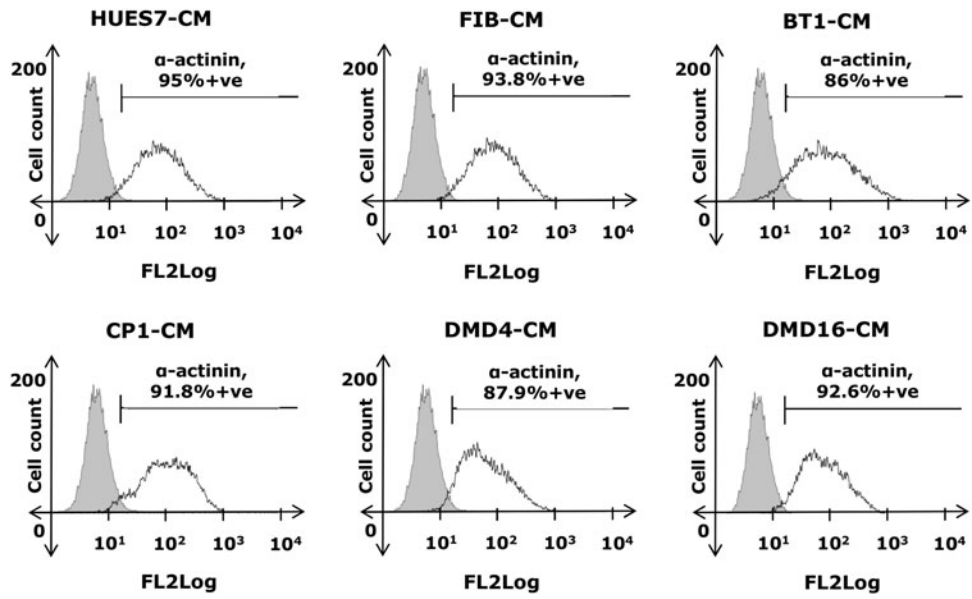

**SUPPLEMENTARY FIG. S6.** Assessment of purity of hPSC-CM preparations by flow cytometry. Flow cytometry data of cardiomyocytes derived from HUES7 hESCs and FIB-, BT1-, CP1-, DMD4-, and DMD16-hiPSCs demonstrating cardiac purities of  $91.2\% \pm 1.4\%$ .
