# Supplementary material for: Automated Electrophysiological and Pharmacological Evaluation of Human Pluripotent Stem Cell-Derived Cardiomyocytes
Source: PubMed Central journal article supplement (PMC4790208; doi:10.1089/scd.2015.0253), 2016-02-23
Supplement: Supp_Figs2-6.pdf [file Supp_Figs2-6.pdf]

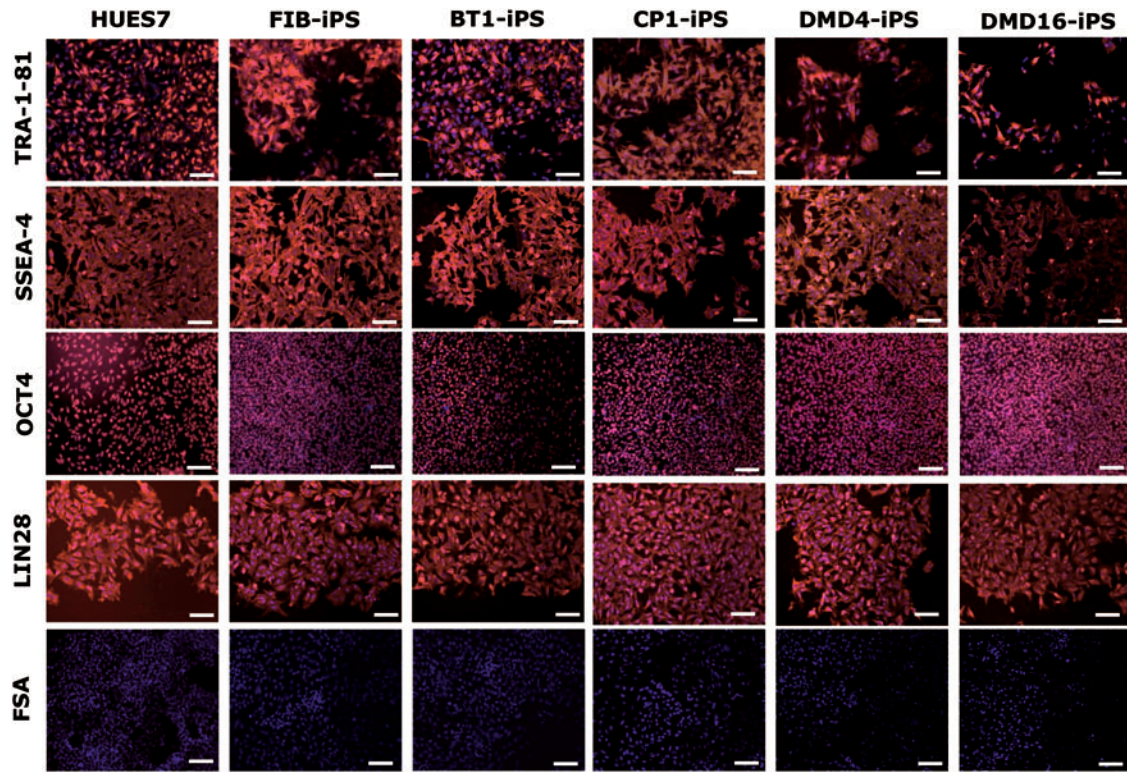

**SUPPLEMENTARY FIG. S2.** Detection of pluripotency marker expression in the hiPSC lines by immunofluorescence. Immunofluorescence analysis of HUES7 hESCs and FIB-, BT1-, CP1-, DMD4- and DMD16-hiPSCs, showing them to stain negative for the fibroblast-specific marker FSA, and stain positive for the pluripotency markers TRA-1-81, SSEA-4, OCT-4, and LIN28. Scale bars represent 65  $\mu$ m. hESCs, human embryonic stem cells.

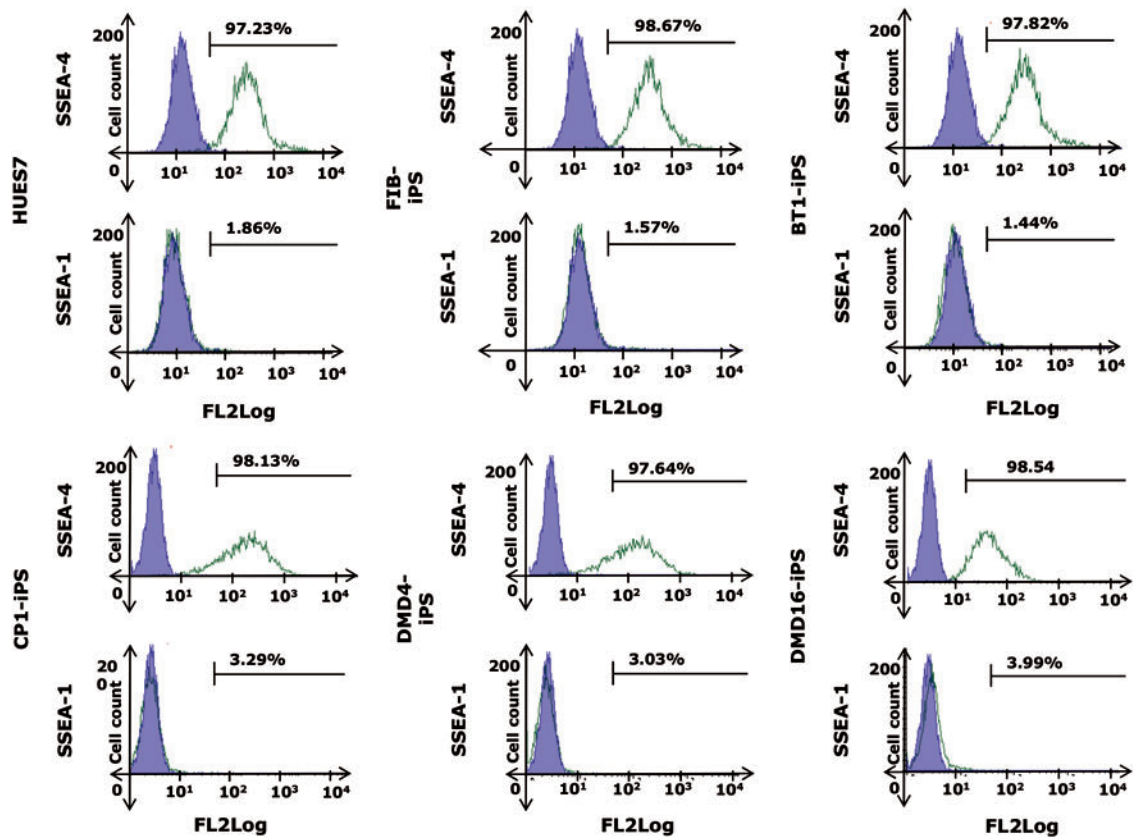

**SUPPLEMENTARY FIG. S3.** Detection of pluripotency marker expression by flow cytometry. Flow cytometry analysis of HUES7 hESCs and FIB-, BT1-, CP1-, DMD4-, and DMD16-hiPSCs, showing them to be positive for the pluripotency marker SSEA-4 and negative for the differentiation marker SSEA-1.

**$\alpha$ -actinin staining of hPSC-CMs**

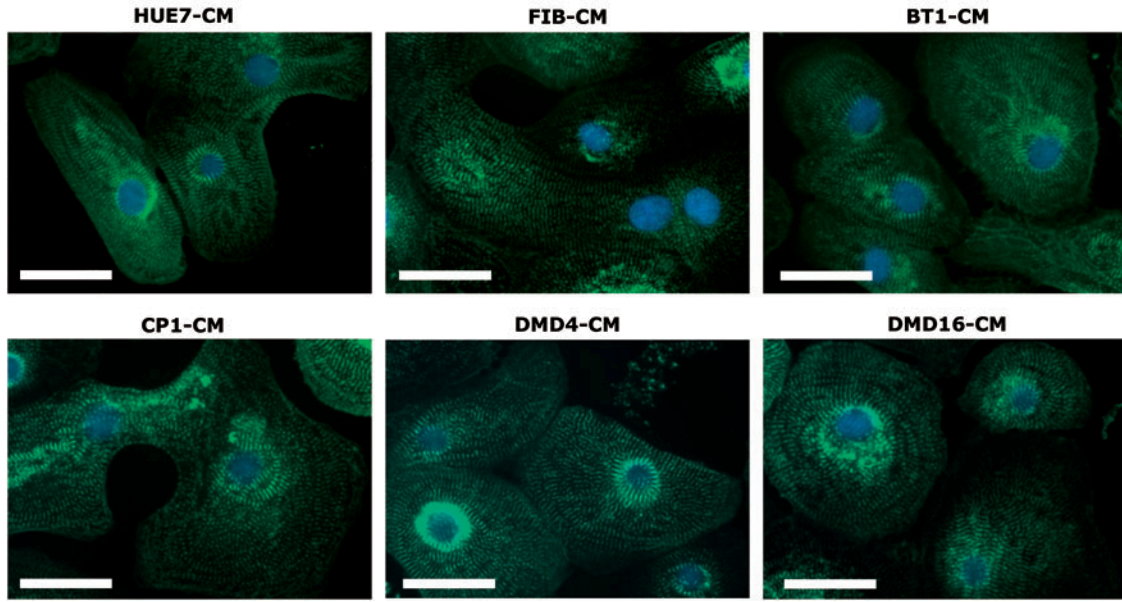

**SUPPLEMENTARY FIG. S4.** Detection of  $\alpha$ -actinin expression in hPSC-CMs by immunofluorescence. Immunofluorescence images of cardiomyocytes derived from HUES7 hESC and FIB-, BT1-, CP1-, DMD4-, and DMD16-hiPSCs, showing positive cardiac  $\alpha$ -actinin staining highlighting characteristic cardiac muscle striations. Scale bars represent 32  $\mu$ m. hPSC-CMs, human pluripotent stem cell-derived cardiomyocytes.

**cTnT staining of hPSC-CMs**

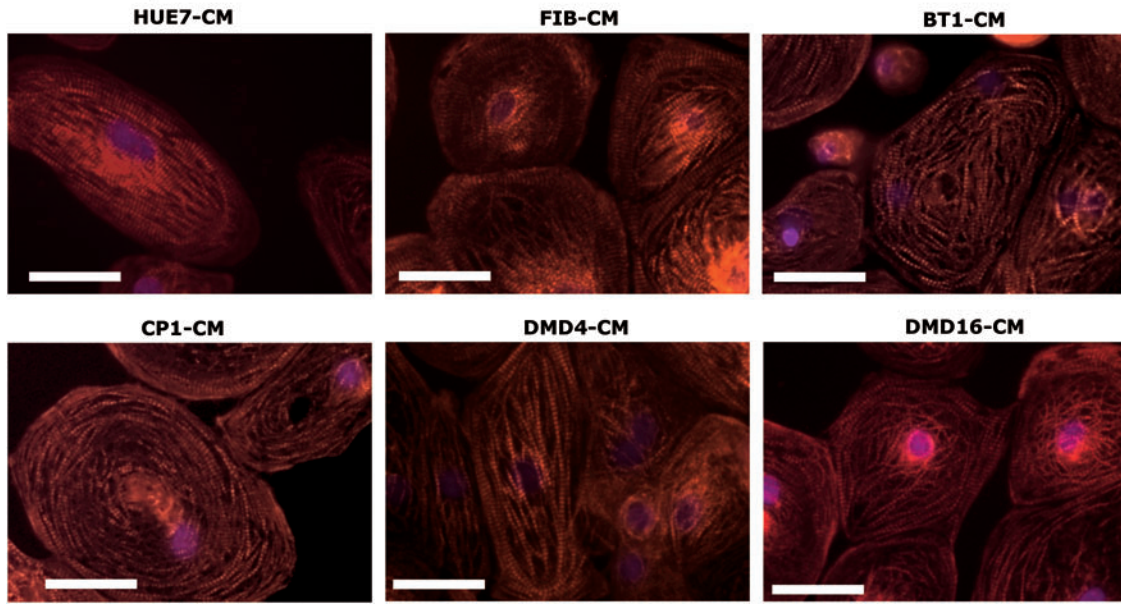

**SUPPLEMENTARY FIG. S5.** Detection of cTnT expression in hPSC-CMs by immunofluorescence. Immunofluorescence images of cardiomyocytes derived from HUES7 hESCs and FIB-, BT1-, CP1-, DMD4-, and DMD16-hiPSCs, showing positive cardiac troponin T staining highlighting characteristic cardiac muscle striations. Scale bars represent 32 μm. cTnT, cardiac troponin T.

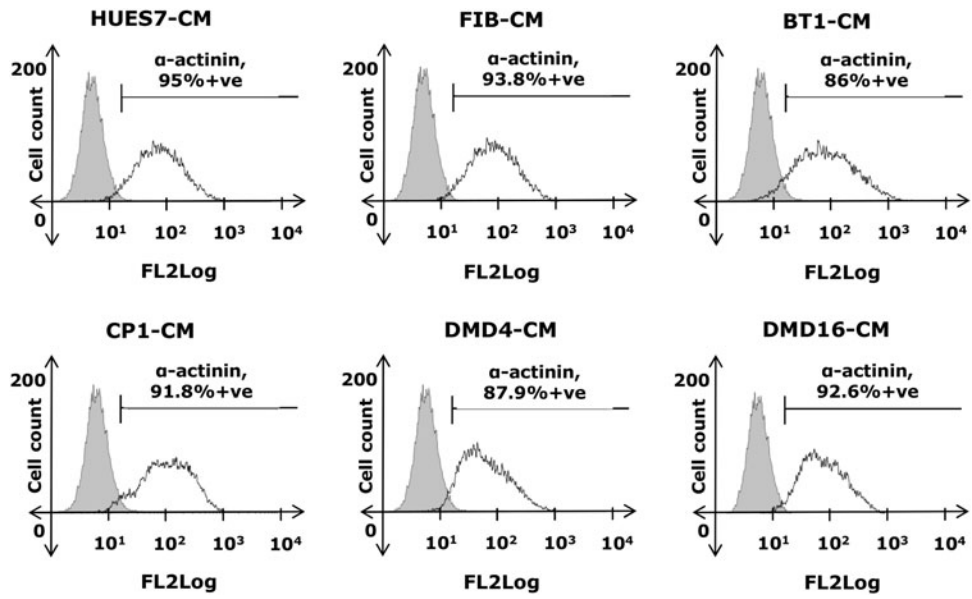

**SUPPLEMENTARY FIG. S6.** Assessment of purity of hPSC-CM preparations by flow cytometry. Flow cytometry data of cardiomyocytes derived from HUES7 hESCs and FIB-, BT1-, CP1-, DMD4-, and DMD16-hiPSCs demonstrating cardiac purities of  $91.2\% \pm 1.4\%$ .
